# Supplementary material
Source: MDPI journal article supplement (https://www.mdpi.com/1424-2818/12/8/311)

# Research topics

**A**

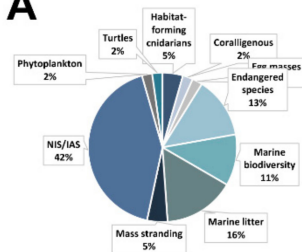

**B**

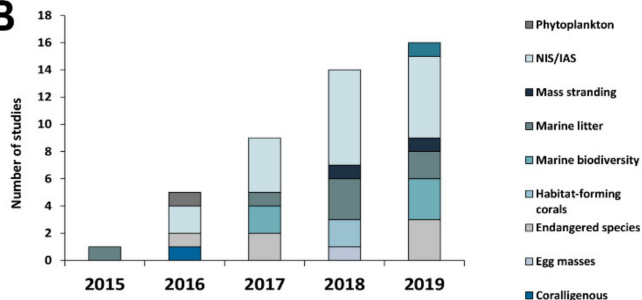

# Research tools

**C**

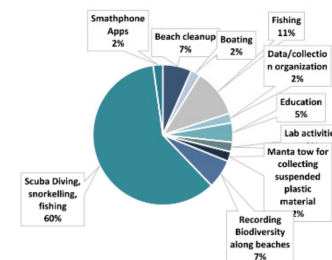

**D**

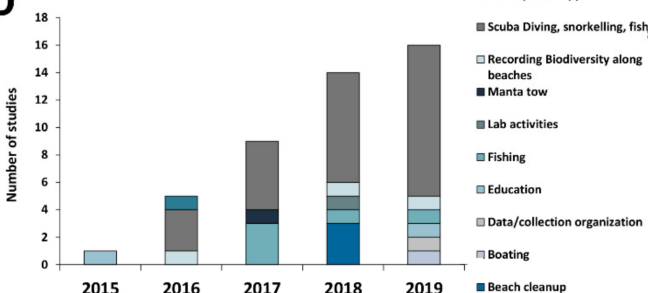

**E**

## Research-based Citizen Science in the Mediterranean Sea

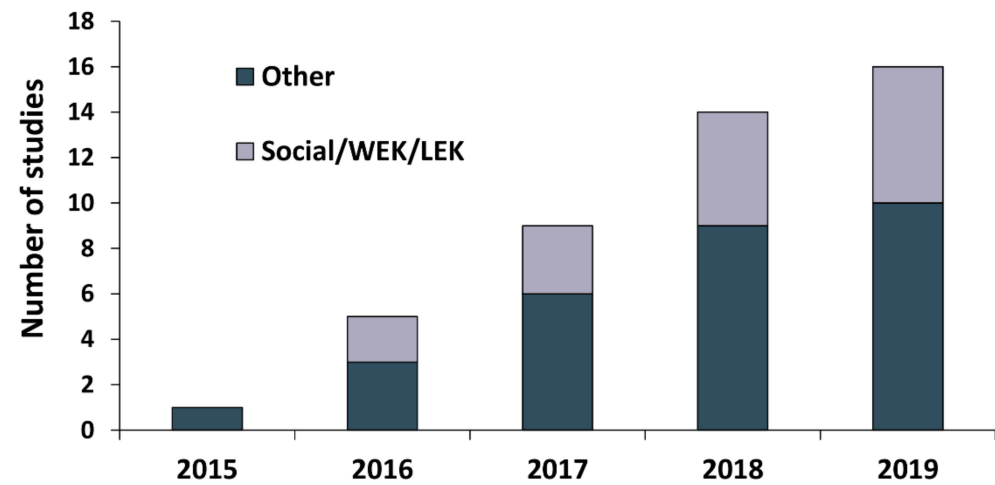

Supplement: s1 [file s1]
