# Supplementary material
Source: MDPI journal article supplement (https://www.mdpi.com/1424-2818/12/8/311)

# Survey

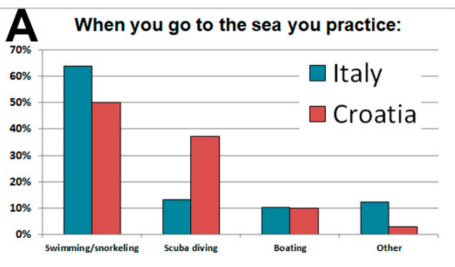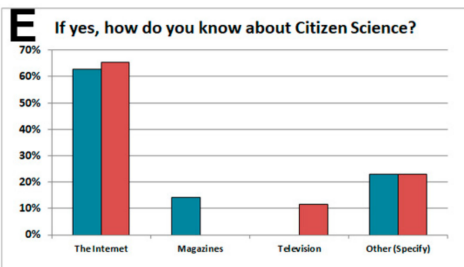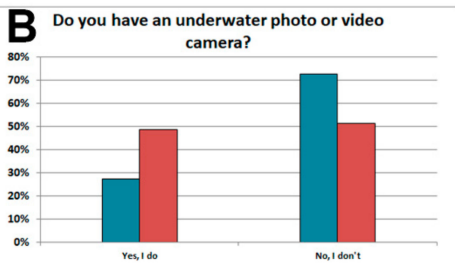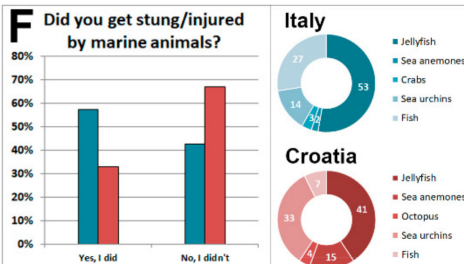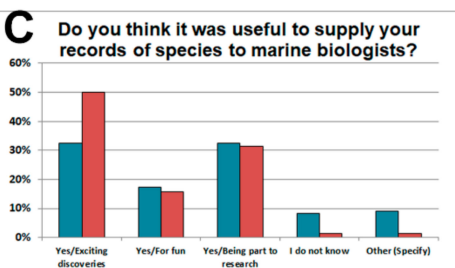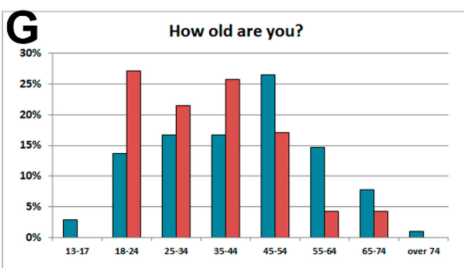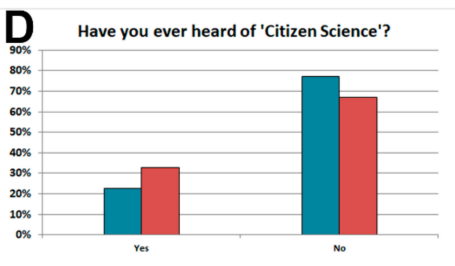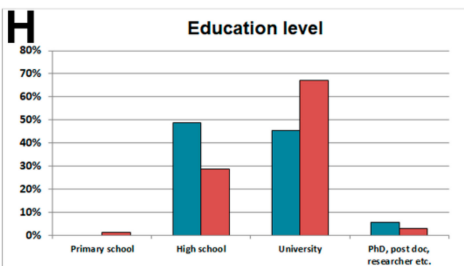

Supplement: s1 [file s1]

# EFFORT COMPARISON

**A** Emerged habitats/  
beaches/surface

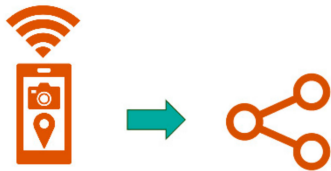

**B** Underwater

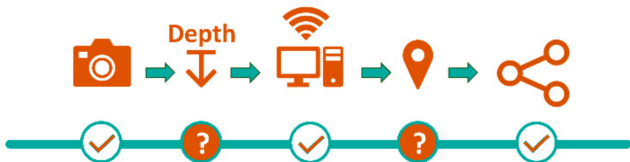

Supplement: s1 [file s1]

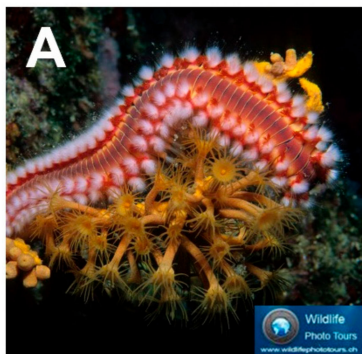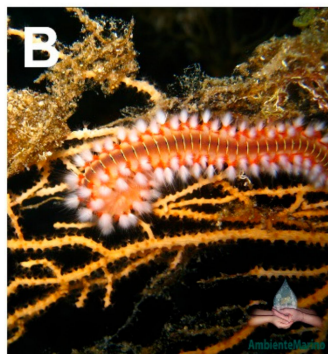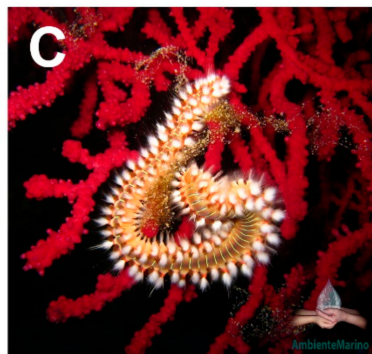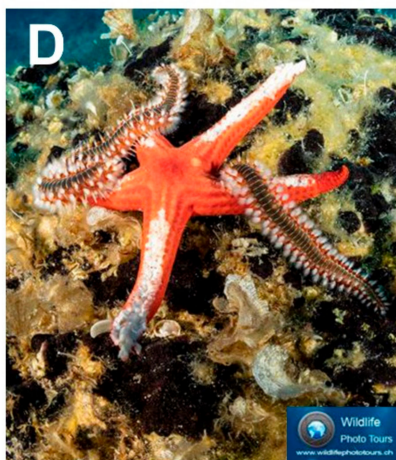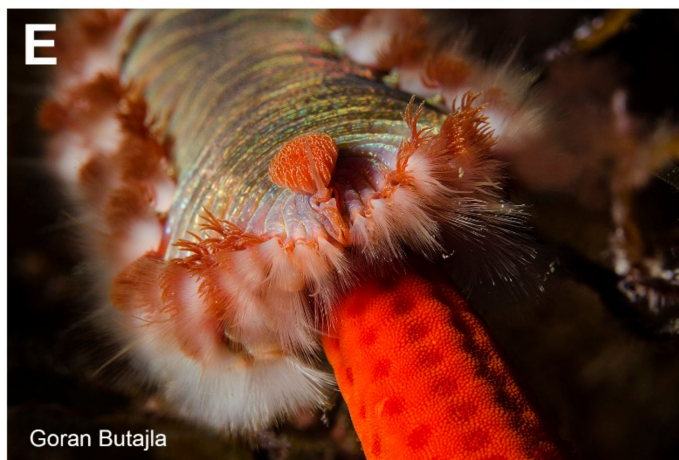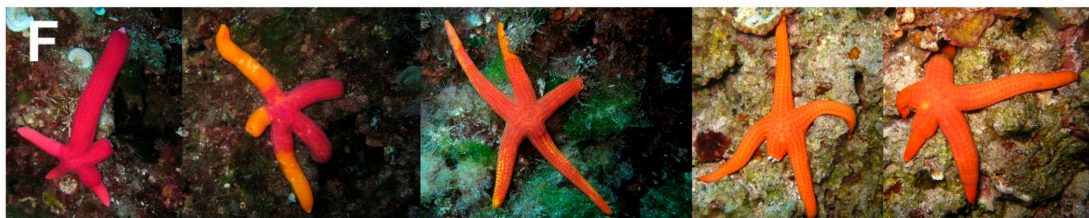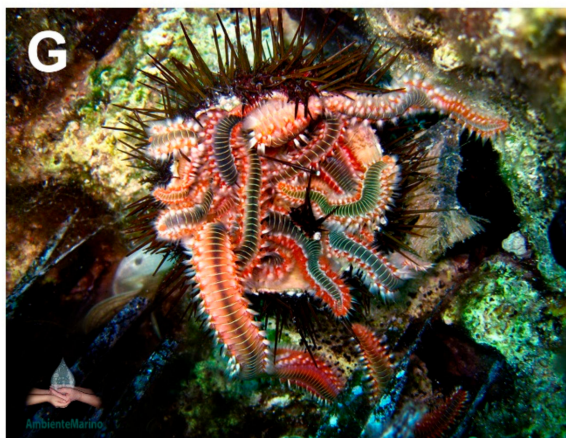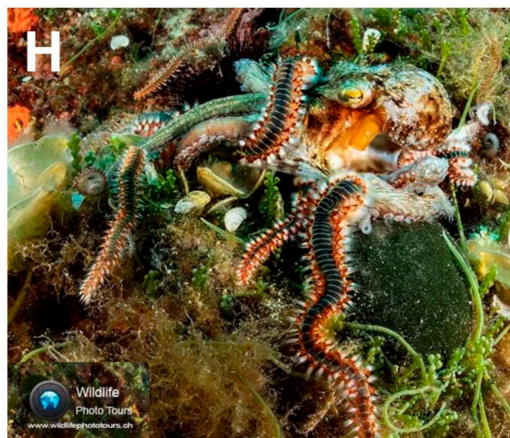

Supplement: s1 [file s1]

# Citizen Science Funnel

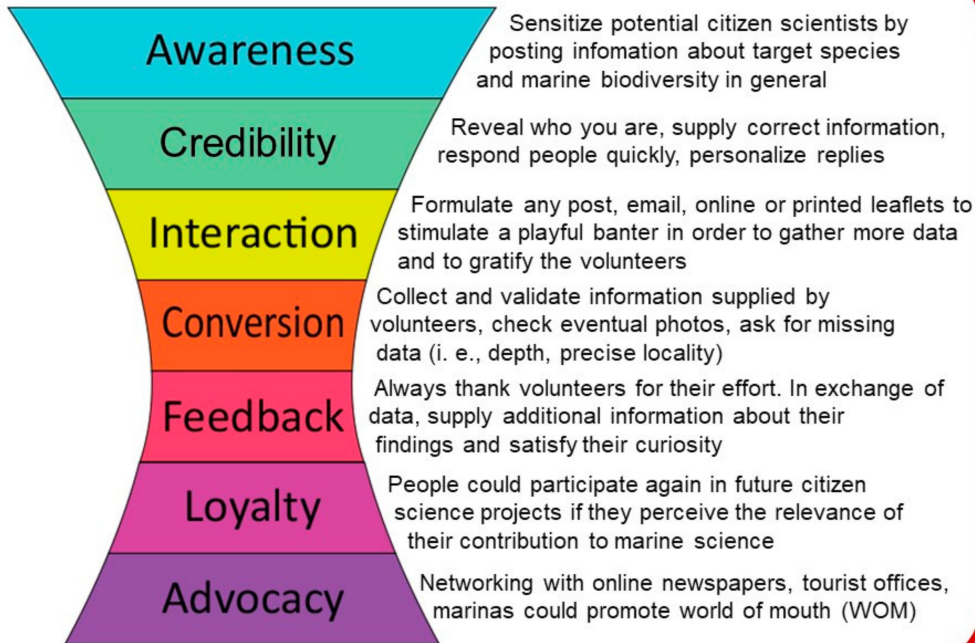

Supplement: s1 [file s1]

## Facebook organic reach

**A**

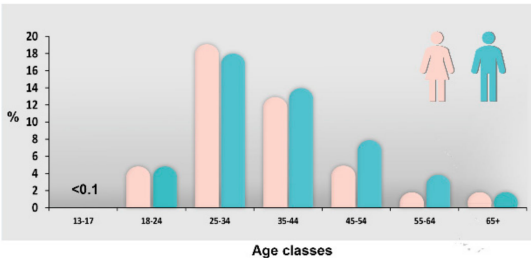

**B**

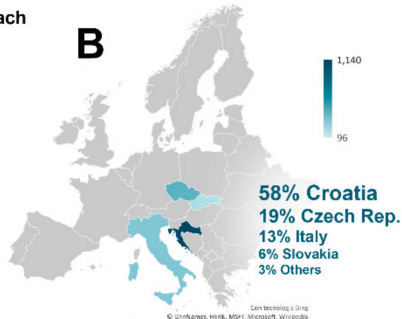

## Scuba diver demographics

**C**

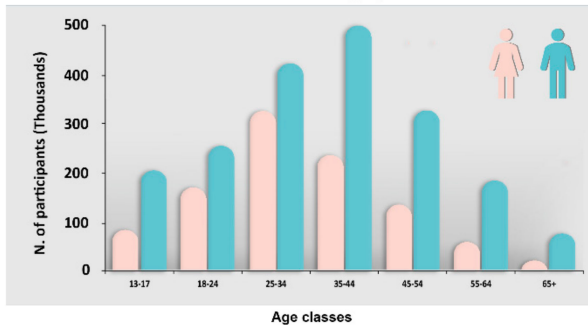

Supplement: s1 [file s1]

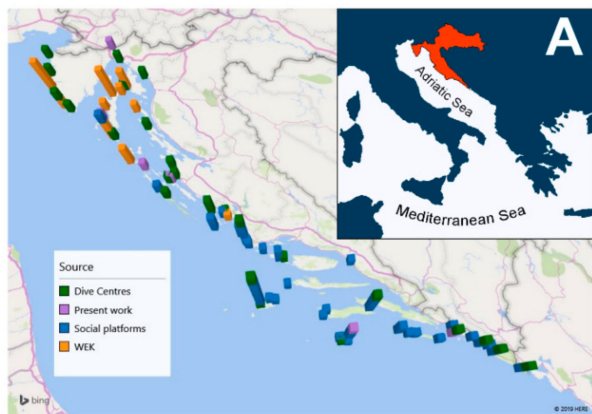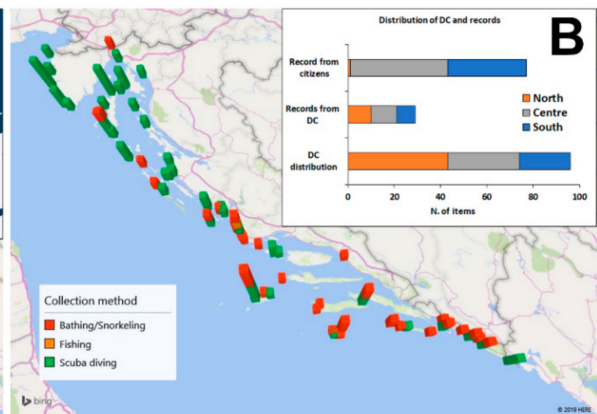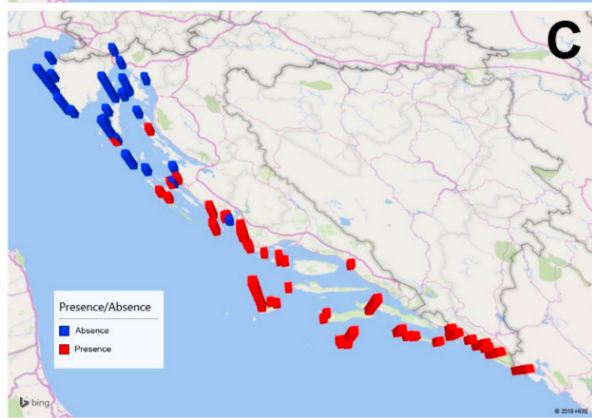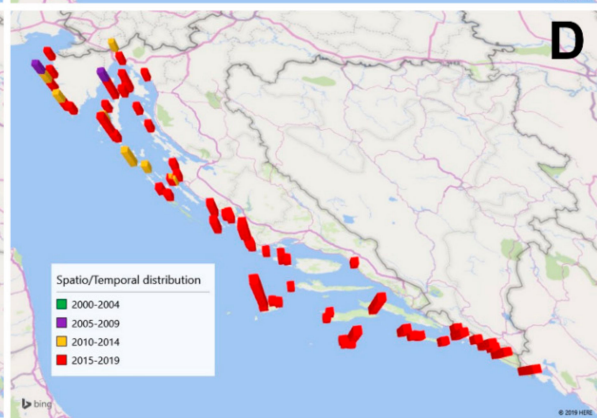

Supplement: s1 [file s1]
